# Supplementary material for: Magnolin Inhibits Paclitaxel-Induced Cold Allodynia and ERK1/2 Activation in Mice
Source: MDPI journal article supplement (doi:10.3390/plants12122283), 2023-06-12

**Figure S1.**  $^1\text{H}$ -NMR spectrum for (+)-magnolol (500MHz,  $\text{CDCl}_3$ )

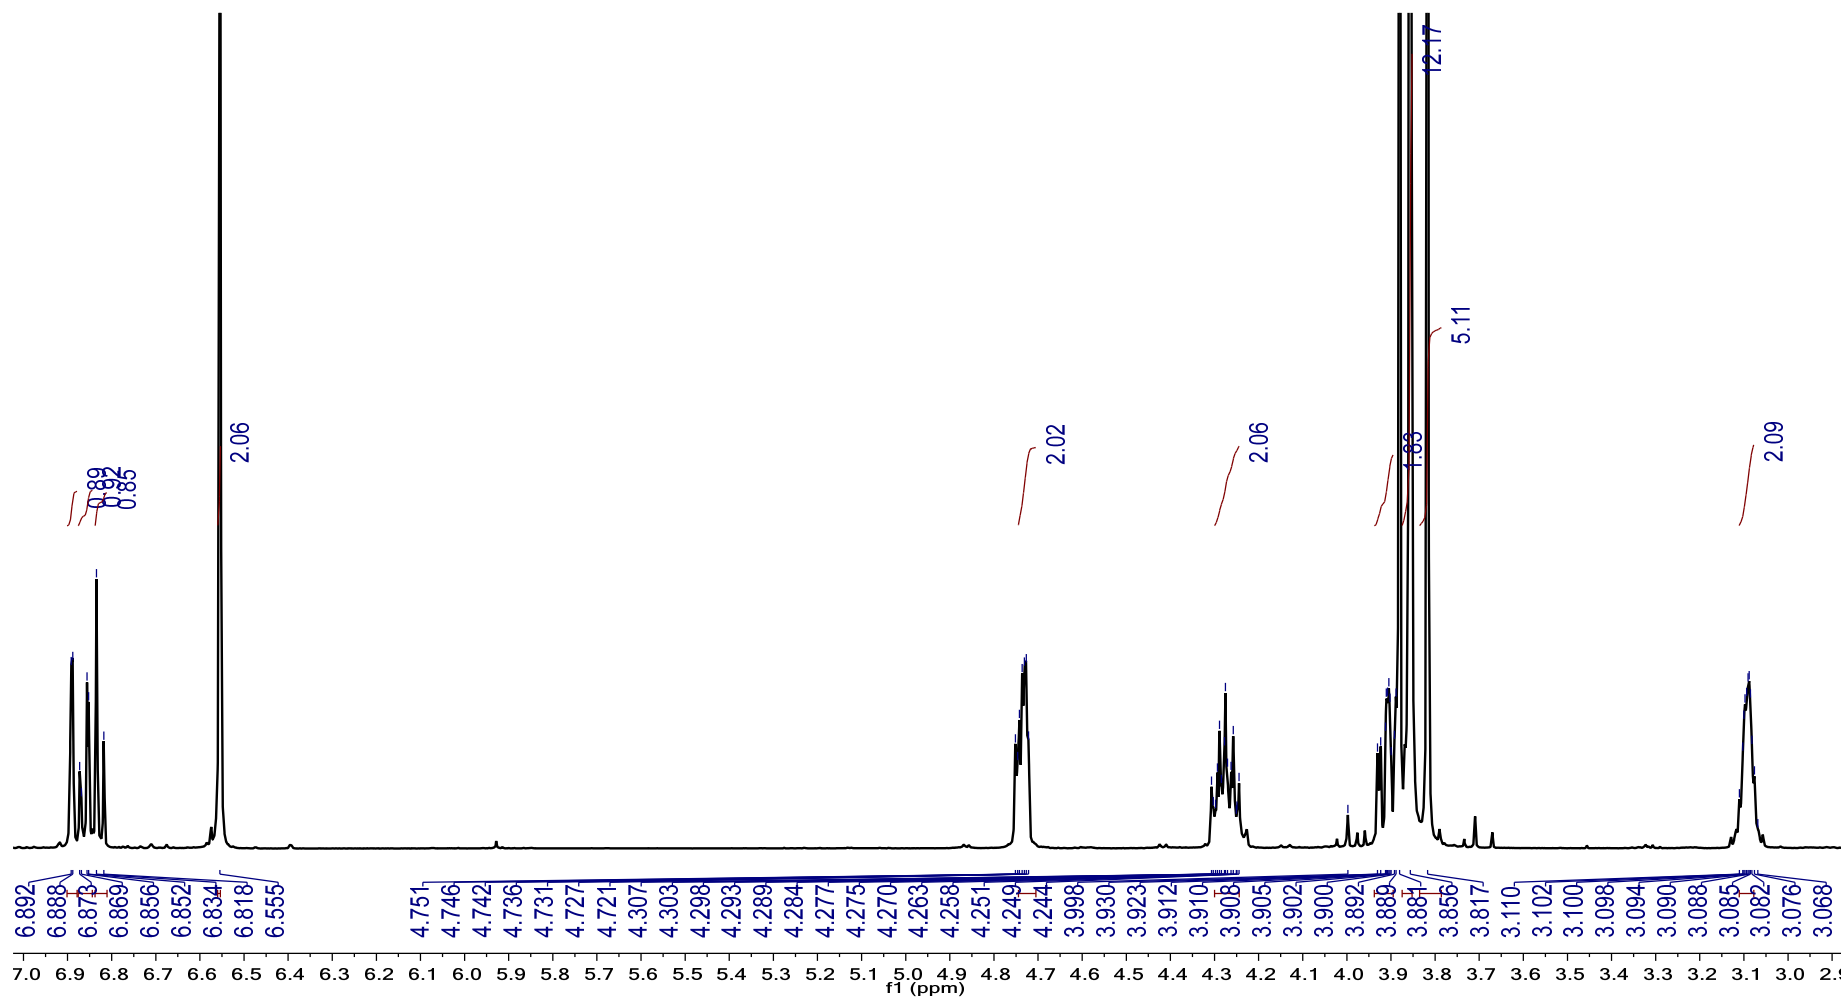

**Figure S2.**  $^{13}\text{C}$ -NMR spectrum for (+)-magnolol (125MHz,  $\text{CDCl}_3$ )

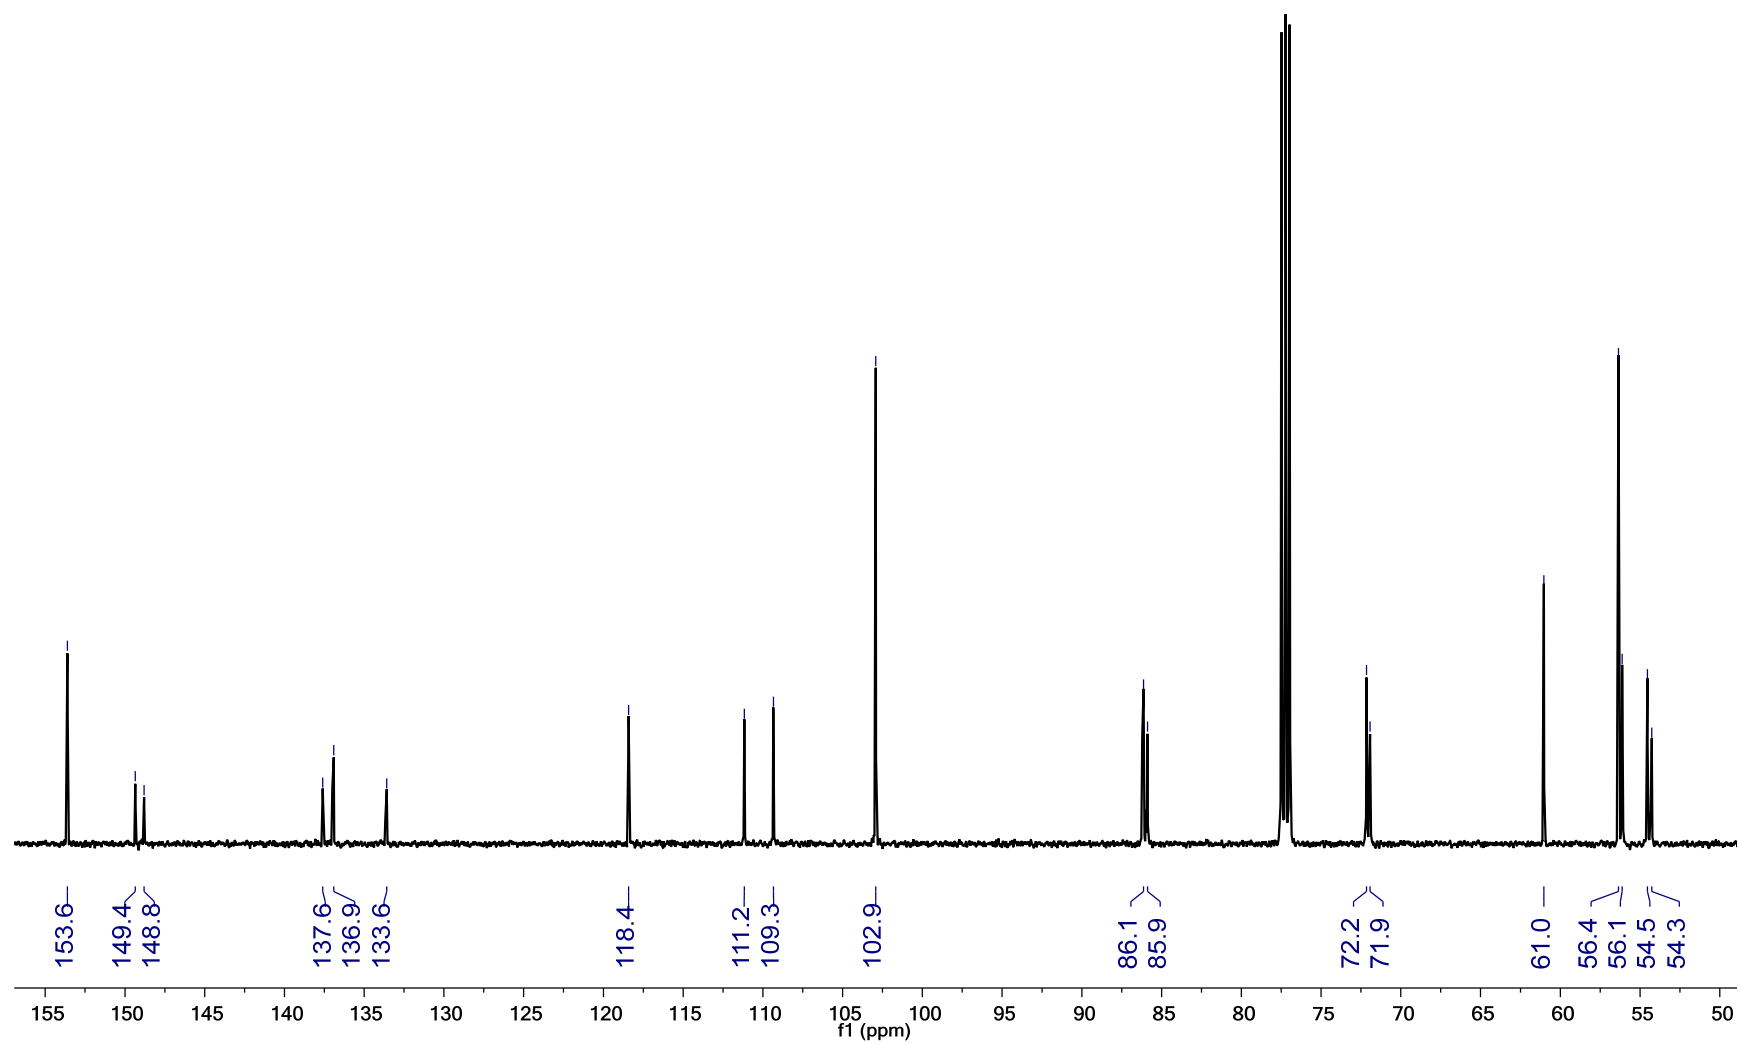

**Figure S3.** UHPLC-PDA-MS chromatogram for (+)-magnolin (RT 15.96 min); A: PDA chromatogram of (+)-magnolin, B: TIC chromatogram of (+)-magnolin, C: UV spectrum of (+)-magnolin, D: ESI Full MS scan of (+)-magnolin. A stock solution of 0.5 mg/mL was dissolved in methanol containing 20% DMSO. Data collected by Thermo Vanquish UHPLC system equipped with Thermo Hypersil GOLD column (1.9 $\mu$ m, 150  $\times$  2.1 mm I.D.). The mobile phase was subjected to a series of linear gradients with a flow rate of 0.3 mL/min: 0–3min, 10% B; 3–35min, 100%B; 35–42min, 100%B; 42–43min 10%B.

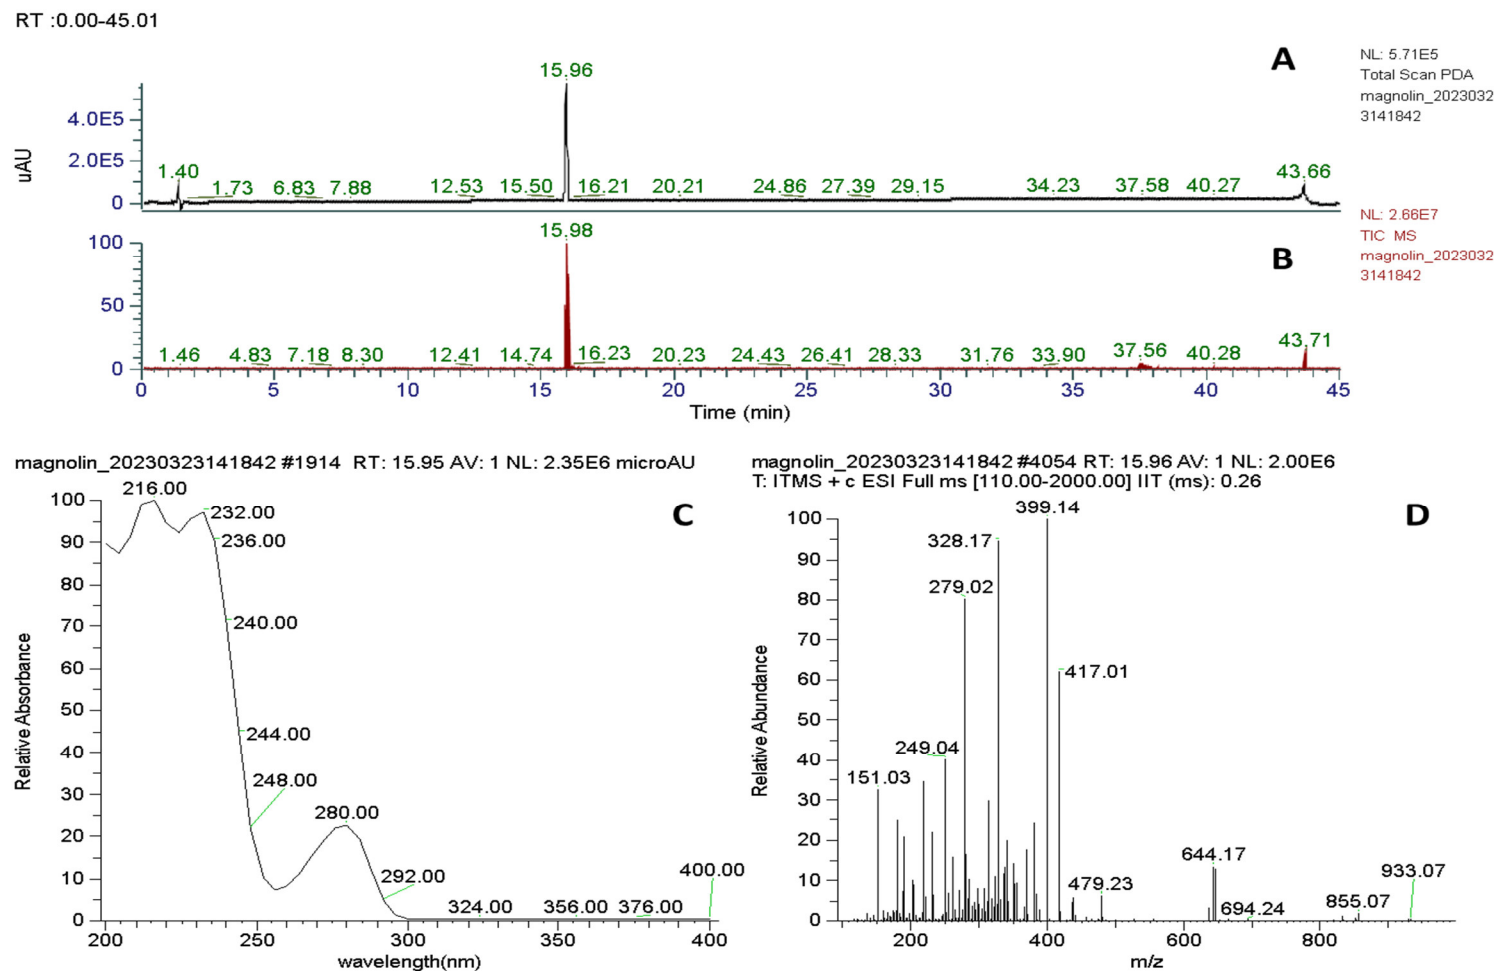

**Figure S4.**  $^1\text{H}$ -NMR spectrum for kobusin (500MHz,  $\text{CDCl}_3$ )

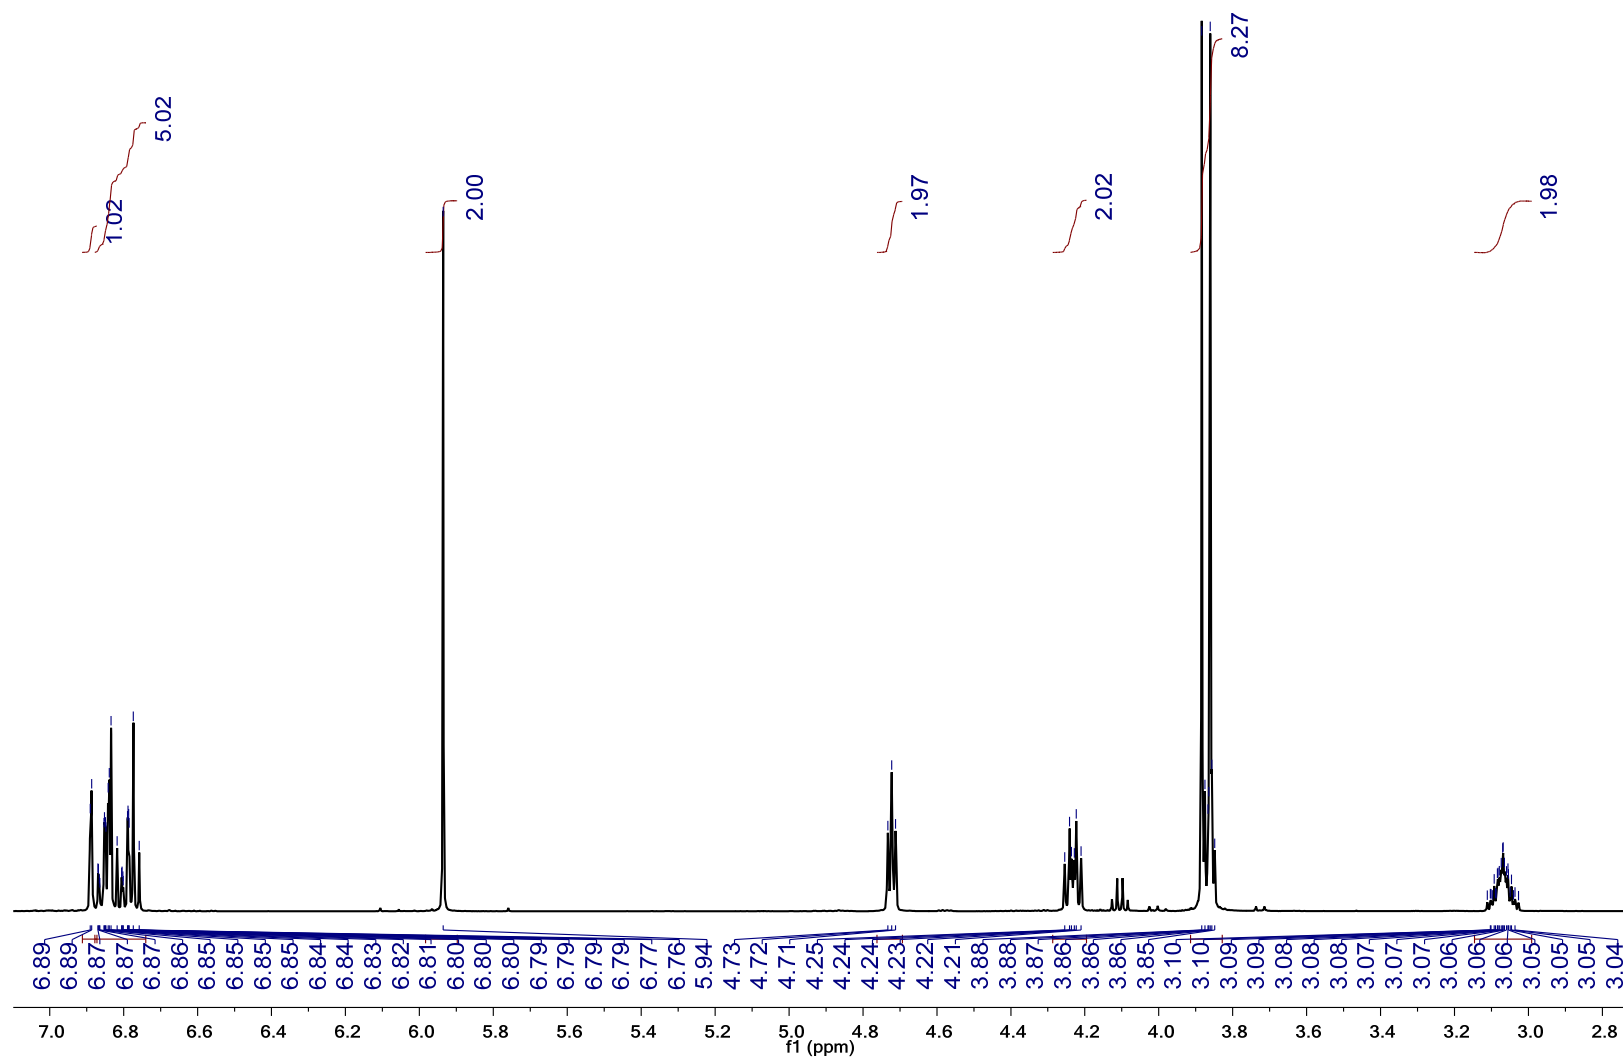

**Figure S5.**  $^1\text{H}$ -NMR spectrum for aschantin (500MHz,  $\text{CDCl}_3$ )

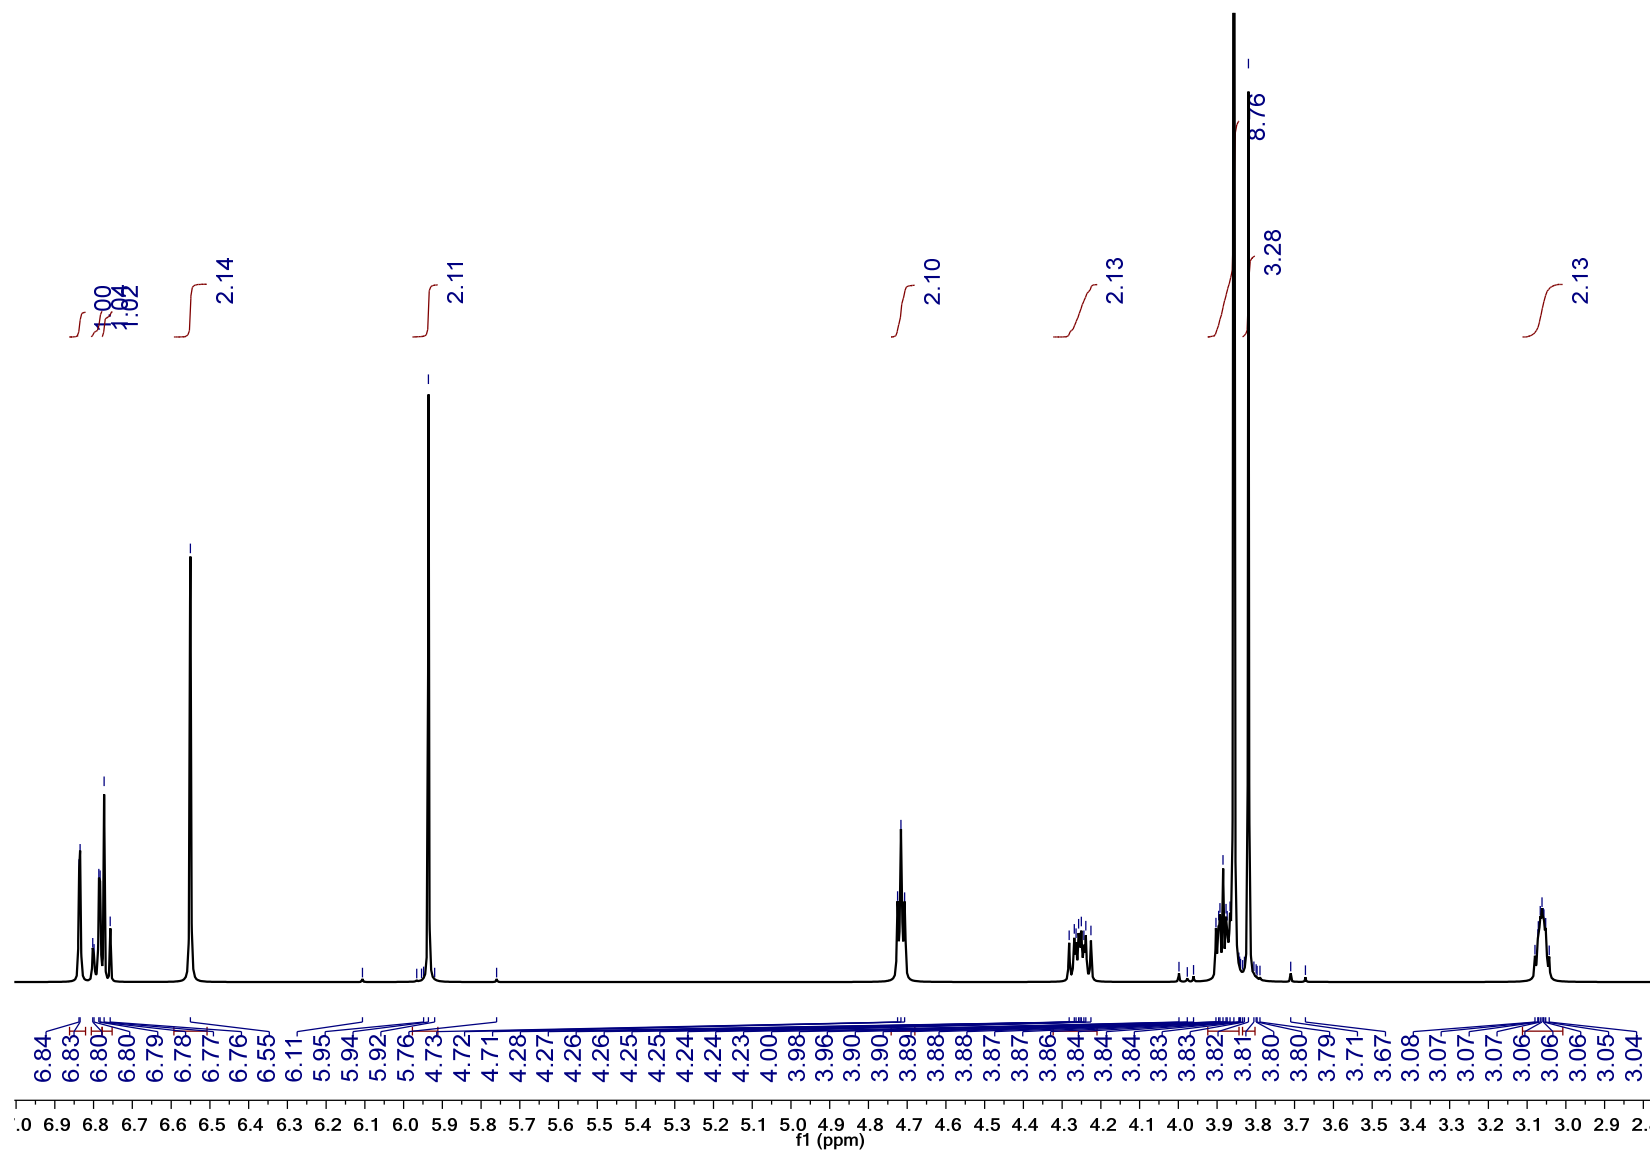

Supplement: s1 [file s1]
